# Supplementary material for: Glucose, adrenaline and palmitate antagonistically regulate insulin and glucagon secretion in human pseudoislets
Source: Springer Nature journal article supplement (doi:10.1038/s41598-019-46545-6), 2019-07-16
Supplement: MOESM1 [file 41598_2019_46545_MOESM1_ESM.pdf › 41598_2019_46545_MOESM1_ESM.pdf]

# Glucose, adrenaline and palmitate antagonistically regulate insulin and glucagon secretion in human pseudoislets

Estela Lorza-Gil, Felicia Gerst, Morgana Barroso Oquendo, Ulrich Deschl, Hans-Ulrich Häring, Mario Beilmann\* and Susanne Ullrich\*

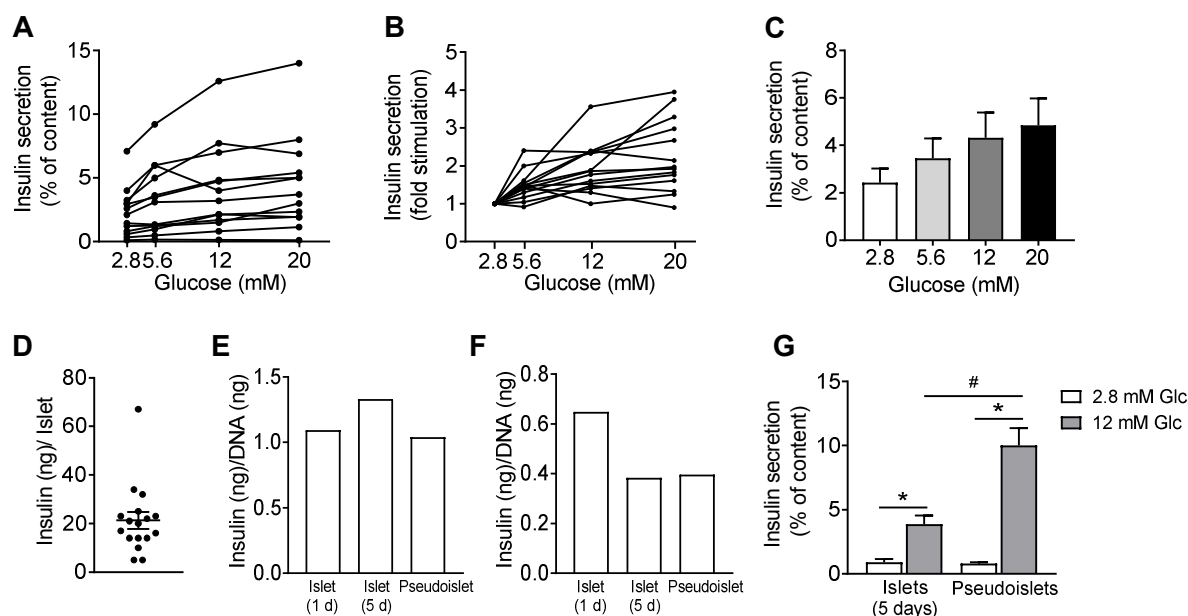

**Supplementary Figure 1** Glucose-stimulated insulin secretion of isolated human islets. Human islets were cultured and GSIS measured as described under Materials and Methods. **(A-C)** GSIS of 13 human islet preparations of different donors expressed as **(A)** % of insulin content and **(B)** glucose stimulation (fold increase over 2.8 mM glucose). **(C)** Data of **(A)** expressed as means + s.e.m. **(D)** Mean islet insulin content of 13 preparations. **(E, F)** Comparison of insulin content/DNA of islets and pseudoislets after 1 d and 5 d of culture as indicated from 2 donors (E donor#31, F donor#32) **(G)** Comparison of GSIS of islets and pseudoislets, both cultured for 5 d. Results are expressed as means + s.e.m. of n = 8 observations from 2 preparations. 2.8 mM glucose (white bars), 12 mM glucose (grey bars), \* denotes significant GSIS, # denotes significant different secretion at 12 mM glucose between islets and pseudoislets.

**Supplementary Table 1** Transcriptome analysis of human islets and pseudoislets by RNAseq. All genes differentially expressed (>2-fold, padj<0.05) in pseudoislets compared to islets. The mRNA levels of 198 genes were higher (>2-fold) and 367 genes were reduced (<2-fold) in pseudoislets when compared to islets (padj<0.05).

A) Differentially expressed genes higher in pseudoislets when compared to islets (>2-fold, padj<0.05).

| Gene stable ID  | Gene name  | baseMean  | log2FoldChange | lfcSE | stat  | pvalue   | padj     |
|-----------------|------------|-----------|----------------|-------|-------|----------|----------|
| ENSG00000121351 | IAPP       | 192670.24 | 2.49           | 0.19  | 13.31 | 1.90E-40 | 3.50E-36 |
| ENSG00000169903 | TM4SF4     | 21211.24  | 1.17           | 0.39  | 3.01  | 2.64E-03 | 3.72E-02 |
| ENSG00000167615 | LENG8      | 7520.34   | 1.18           | 0.29  | 4.05  | 5.07E-05 | 2.30E-03 |
| ENSG00000131094 | C1QL1      | 4837.17   | 1.13           | 0.36  | 3.11  | 1.85E-03 | 3.02E-02 |
| ENSG00000075035 | WSCD2      | 4296.33   | 1.39           | 0.31  | 4.53  | 6.01E-06 | 4.63E-04 |
| ENSG00000126266 | FFAR1      | 3845.74   | 1.03           | 0.26  | 3.99  | 6.51E-05 | 2.81E-03 |
| ENSG00000166923 | GREM1      | 3758.20   | 1.54           | 0.44  | 3.49  | 4.87E-04 | 1.20E-02 |
| ENSG00000114631 | PODXL2     | 3460.07   | 1.11           | 0.25  | 4.37  | 1.22E-05 | 7.87E-04 |
| ENSG00000117472 | TSPAN1     | 2887.17   | 1.56           | 0.20  | 7.97  | 1.56E-15 | 5.68E-12 |
| ENSG00000175262 | C1orf127   | 2885.55   | 1.09           | 0.34  | 3.19  | 1.42E-03 | 2.53E-02 |
| ENSG00000136883 | KIF12      | 2748.66   | 1.04           | 0.36  | 2.91  | 3.66E-03 | 4.56E-02 |
| ENSG00000174871 | CNIH2      | 2291.28   | 1.29           | 0.18  | 6.99  | 2.84E-12 | 2.16E-09 |
| ENSG00000139329 | LUM        | 2235.16   | 1.06           | 0.36  | 2.93  | 3.43E-03 | 4.37E-02 |
| ENSG00000140465 | CYP1A1     | 1968.17   | 1.66           | 0.52  | 3.20  | 1.36E-03 | 2.46E-02 |
| ENSG00000197635 | DPP4       | 1825.37   | 1.28           | 0.21  | 6.08  | 1.17E-09 | 4.46E-07 |
| ENSG00000197119 | SLC25A29   | 1450.82   | 1.10           | 0.16  | 7.04  | 1.90E-12 | 1.65E-09 |
| ENSG00000019582 | CD74       | 1353.56   | 1.14           | 0.32  | 3.57  | 3.56E-04 | 9.57E-03 |
| ENSG00000150594 | ADRA2A     | 1030.25   | 1.11           | 0.29  | 3.86  | 1.15E-04 | 4.26E-03 |
| ENSG00000165899 | OTOGL      | 1009.17   | 1.11           | 0.33  | 3.36  | 7.72E-04 | 1.69E-02 |
| ENSG00000145362 | ANK2       | 974.63    | 1.09           | 0.35  | 3.10  | 1.94E-03 | 3.11E-02 |
| ENSG00000171551 | ECEL1      | 940.92    | 1.41           | 0.34  | 4.15  | 3.29E-05 | 1.68E-03 |
| ENSG00000173805 | HAP1       | 773.35    | 1.61           | 0.29  | 5.47  | 4.56E-08 | 9.15E-06 |
| ENSG00000153012 | LG12       | 737.90    | 1.36           | 0.34  | 3.95  | 7.73E-05 | 3.21E-03 |
| ENSG00000049089 | COL9A2     | 722.73    | 1.21           | 0.29  | 4.20  | 2.67E-05 | 1.43E-03 |
| ENSG00000153822 | KCNJ16     | 721.14    | 1.48           | 0.33  | 4.54  | 5.57E-06 | 4.34E-04 |
| ENSG00000163581 | SLC2A2     | 636.55    | 1.67           | 0.30  | 5.53  | 3.18E-08 | 6.53E-06 |
| ENSG00000123243 | ITIH5      | 602.57    | 1.21           | 0.36  | 3.34  | 8.47E-04 | 1.79E-02 |
| ENSG00000168309 | FAM107A    | 599.79    | 1.27           | 0.37  | 3.42  | 6.28E-04 | 1.47E-02 |
| ENSG00000144152 | FBLN7      | 598.79    | 1.20           | 0.19  | 6.36  | 1.96E-10 | 9.95E-08 |
| ENSG00000143630 | HCN3       | 594.79    | 1.34           | 0.25  | 5.46  | 4.82E-08 | 9.56E-06 |
| ENSG00000196169 | KIF19      | 562.21    | 1.10           | 0.37  | 2.99  | 2.76E-03 | 3.82E-02 |
| ENSG00000134827 | TCN1       | 489.76    | 3.79           | 0.80  | 4.76  | 1.93E-06 | 1.79E-04 |
| ENSG00000182752 | PAPPA      | 474.60    | 1.12           | 0.28  | 4.04  | 5.34E-05 | 2.40E-03 |
| ENSG00000170099 | SERPINA6   | 473.17    | 1.89           | 0.56  | 3.37  | 7.49E-04 | 1.65E-02 |
| ENSG00000152953 | STK32B     | 446.91    | 1.07           | 0.36  | 3.01  | 2.64E-03 | 3.72E-02 |
| ENSG00000099869 | IGF2-AS    | 440.59    | 1.56           | 0.53  | 2.91  | 3.56E-03 | 4.50E-02 |
| ENSG00000113924 | HGD        | 439.67    | 1.03           | 0.28  | 3.63  | 2.83E-04 | 8.23E-03 |
| ENSG00000174358 | SLC6A19    | 437.83    | 1.22           | 0.40  | 3.02  | 2.54E-03 | 3.63E-02 |
| ENSG00000119943 | PYROXD2    | 431.09    | 1.37           | 0.43  | 3.16  | 1.59E-03 | 2.72E-02 |
| ENSG00000116032 | GRIN3B     | 425.79    | 2.77           | 0.55  | 5.06  | 4.14E-07 | 5.31E-05 |
| ENSG00000112276 | BVES       | 388.89    | 1.20           | 0.36  | 3.30  | 9.57E-04 | 1.95E-02 |
| ENSG00000174827 | PDZK1      | 372.83    | 1.46           | 0.47  | 3.12  | 1.78E-03 | 2.95E-02 |
| ENSG00000182575 | NXPH3      | 369.49    | 1.06           | 0.29  | 3.64  | 2.75E-04 | 8.07E-03 |
| ENSG00000163462 | TRIM46     | 359.52    | 1.04           | 0.24  | 4.42  | 9.75E-06 | 6.72E-04 |
| ENSG00000175868 | CALCB      | 334.17    | 1.76           | 0.52  | 3.39  | 6.96E-04 | 1.57E-02 |
| ENSG00000070601 | FRMPD1     | 331.07    | 1.32           | 0.42  | 3.12  | 1.79E-03 | 2.96E-02 |
| ENSG00000064300 | NGFR       | 321.25    | 3.12           | 0.86  | 3.63  | 2.82E-04 | 8.20E-03 |
| ENSG00000084453 | SLCO1A2    | 287.69    | 1.18           | 0.21  | 5.57  | 2.60E-08 | 5.52E-06 |
| ENSG00000166959 | MS4A8      | 273.17    | 1.01           | 0.22  | 4.51  | 6.46E-06 | 4.91E-04 |
| ENSG00000125492 | BARHL1     | 265.73    | 1.97           | 0.37  | 5.27  | 1.39E-07 | 2.18E-05 |
| ENSG00000143341 | HMCN1      | 238.30    | 1.59           | 0.43  | 3.66  | 2.56E-04 | 7.67E-03 |
| ENSG00000124491 | F13A1      | 237.83    | 1.45           | 0.44  | 3.33  | 8.68E-04 | 1.81E-02 |
| ENSG00000259834 | AL365361.1 | 231.48    | 1.06           | 0.22  | 4.78  | 1.75E-06 | 1.67E-04 |
| ENSG00000241388 | HNF1A-AS1  | 223.98    | 1.48           | 0.34  | 4.30  | 1.73E-05 | 1.02E-03 |
| ENSG00000106331 | PAX4       | 214.31    | 2.61           | 0.61  | 4.28  | 1.91E-05 | 1.10E-03 |
| ENSG00000230006 | ANKRD36BP2 | 206.54    | 1.20           | 0.29  | 4.17  | 2.99E-05 | 1.57E-03 |
| ENSG00000121207 | LRAT       | 205.87    | 2.04           | 0.48  | 4.29  | 1.82E-05 | 1.06E-03 |
| ENSG00000230928 | AL139241.1 | 197.60    | 1.77           | 0.56  | 3.14  | 1.68E-03 | 2.82E-02 |
| ENSG00000183379 | SYNDIG1L   | 195.43    | 2.47           | 0.65  | 3.82  | 1.31E-04 | 4.70E-03 |
| ENSG00000184221 | OLIG1      | 195.31    | 1.12           | 0.36  | 3.10  | 1.93E-03 | 3.11E-02 |
| ENSG00000135472 | FAIM2      | 188.46    | 1.79           | 0.30  | 5.99  | 2.07E-09 | 7.55E-07 |
| ENSG00000103485 | QPR1       | 180.31    | 1.14           | 0.26  | 4.40  | 1.09E-05 | 7.27E-04 |
| ENSG00000206120 | EGFEM1P    | 176.47    | 1.65           | 0.31  | 5.40  | 6.74E-08 | 1.24E-05 |
| ENSG00000108932 | SLC16A6    | 156.76    | 1.20           | 0.28  | 4.25  | 2.14E-05 | 1.20E-03 |
| ENSG00000134193 | REG4       | 150.61    | 1.29           | 0.32  | 3.97  | 7.16E-05 | 3.03E-03 |
| ENSG00000171246 | NPTX1      | 148.38    | 1.63           | 0.49  | 3.34  | 8.45E-04 | 1.79E-02 |
| ENSG00000177301 | KCNA2      | 144.78    | 1.04           | 0.30  | 3.43  | 6.05E-04 | 1.43E-02 |
| ENSG00000099937 | SERPIND1   | 138.39    | 1.93           | 0.33  | 5.79  | 6.92E-09 | 2.04E-06 |
| ENSG00000197182 | MIRLET7BHG | 138.38    | 1.07           | 0.19  | 5.63  | 1.84E-08 | 4.36E-06 |
| ENSG00000171759 | PAH        | 134.69    | 1.57           | 0.41  | 3.84  | 1.22E-04 | 4.48E-03 |
| ENSG00000172346 | CSDC2      | 123.82    | 1.09           | 0.22  | 4.86  | 1.15E-06 | 1.21E-04 |
| ENSG00000280434 | AL031595.3 | 123.77    | 1.50           | 0.27  | 5.61  | 2.05E-08 | 4.74E-06 |
| ENSG00000246451 | AL049840.1 | 122.42    | 1.12           | 0.21  | 5.38  | 7.42E-08 | 1.33E-05 |
| ENSG00000170271 | FAXDC2     | 121.32    | 1.35           | 0.35  | 3.81  | 1.37E-04 | 4.84E-03 |
| ENSG00000126583 | PRKCG      | 117.62    | 1.06           | 0.33  | 3.19  | 1.43E-03 | 2.54E-02 |
| ENSG00000100191 | SLC5A4     | 113.70    | 1.71           | 0.23  | 7.30  | 2.84E-13 | 3.24E-10 |
| ENSG00000237940 | LINC01238  | 111.82    | 1.31           | 0.41  | 3.20  | 1.37E-03 | 2.47E-02 |
| ENSG00000177675 | CD163L1    | 107.40    | 1.55           | 0.51  | 3.05  | 2.31E-03 | 3.44E-02 |
| ENSG00000280119 | AC093642.2 | 104.75    | 1.25           | 0.41  | 3.06  | 2.20E-03 | 3.34E-02 |
| ENSG00000136542 | GALNT5     | 103.03    | 1.55           | 0.49  | 3.15  | 1.62E-03 | 2.76E-02 |
| ENSG00000160307 | S100B      | 100.90    | 1.57           | 0.38  | 4.16  | 3.21E-05 | 1.65E-03 |
| ENSG00000232680 | AC002511.1 | 99.76     | 1.01           | 0.25  | 3.98  | 7.04E-05 | 2.98E-03 |
| ENSG00000166035 | LIPC       | 99.66     | 1.07           | 0.35  | 3.05  | 2.33E-03 | 3.44E-02 |

| Gene stable ID  | Gene name   | baseMean | log2FoldChange | lfcSE | stat | pvalue   | padj     |
|-----------------|-------------|----------|----------------|-------|------|----------|----------|
| ENSG00000198569 | SLC34A3     | 94.76    | 1.38           | 0.39  | 3.58 | 3.41E-04 | 9.27E-03 |
| ENSG00000100146 | SOX10       | 93.66    | 3.67           | 1.12  | 3.26 | 1.10E-03 | 2.16E-02 |
| ENSG00000124882 | EREG        | 91.54    | 4.33           | 1.01  | 4.28 | 1.89E-05 | 1.09E-03 |
| ENSG00000235688 | AC116614.1  | 86.82    | 1.07           | 0.33  | 3.22 | 1.28E-03 | 2.36E-02 |
| ENSG00000137857 | DUOX1       | 86.39    | 1.45           | 0.22  | 6.50 | 8.05E-11 | 5.25E-08 |
| ENSG00000066405 | CLDN18      | 83.97    | 1.42           | 0.44  | 3.23 | 1.23E-03 | 2.30E-02 |
| ENSG00000154263 | ABCA10      | 83.24    | 1.00           | 0.19  | 5.15 | 2.60E-07 | 3.63E-05 |
| ENSG00000279905 | AC063926.3  | 81.78    | 1.01           | 0.32  | 3.18 | 1.50E-03 | 2.62E-02 |
| ENSG00000002726 | AOC1        | 73.12    | 1.44           | 0.35  | 4.17 | 3.02E-05 | 1.57E-03 |
| ENSG00000188487 | INSC        | 73.09    | 1.35           | 0.46  | 2.94 | 3.24E-03 | 4.22E-02 |
| ENSG00000170703 | TTL6        | 72.81    | 1.18           | 0.32  | 3.73 | 1.88E-04 | 6.15E-03 |
| ENSG00000002745 | WNT16       | 71.65    | 4.84           | 1.22  | 3.97 | 7.32E-05 | 3.07E-03 |
| ENSG00000259683 | AC243562.2  | 69.80    | 1.41           | 0.24  | 5.83 | 5.51E-09 | 1.71E-06 |
| ENSG00000225465 | RFPL1S      | 69.46    | 1.12           | 0.34  | 3.29 | 1.01E-03 | 2.02E-02 |
| ENSG00000279716 | AC006128.1  | 68.19    | 1.32           | 0.40  | 3.34 | 8.42E-04 | 1.78E-02 |
| ENSG00000104371 | DKK4        | 65.15    | 1.32           | 0.40  | 3.32 | 9.02E-04 | 1.87E-02 |
| ENSG00000242268 | LINC02082   | 63.16    | 1.57           | 0.43  | 3.62 | 2.94E-04 | 8.44E-03 |
| ENSG00000042062 | RIPOR3      | 60.90    | 1.49           | 0.48  | 3.10 | 1.95E-03 | 3.11E-02 |
| ENSG00000167549 | CORO6       | 59.48    | 1.49           | 0.41  | 3.61 | 3.04E-04 | 8.64E-03 |
| ENSG00000122711 | SPINK4      | 57.28    | 1.63           | 0.55  | 2.97 | 2.96E-03 | 3.99E-02 |
| ENSG00000142484 | TM4SF5      | 54.53    | 1.86           | 0.32  | 5.78 | 7.26E-09 | 2.07E-06 |
| ENSG00000168913 | ENHO        | 53.81    | 1.15           | 0.32  | 3.60 | 3.13E-04 | 8.78E-03 |
| ENSG00000180998 | GPR137C     | 50.72    | 1.38           | 0.28  | 4.85 | 1.21E-06 | 1.25E-04 |
| ENSG00000204347 | BTBD17      | 50.35    | 1.03           | 0.35  | 2.91 | 3.64E-03 | 4.56E-02 |
| ENSG00000185897 | FFAR3       | 49.27    | 1.09           | 0.30  | 3.66 | 2.54E-04 | 7.63E-03 |
| ENSG00000235890 | TSPEAR-AS1  | 46.65    | 1.15           | 0.40  | 2.89 | 3.81E-03 | 4.67E-02 |
| ENSG00000225806 | AL121917.1  | 46.53    | 1.41           | 0.24  | 5.83 | 5.39E-09 | 1.70E-06 |
| ENSG00000155659 | VSIG4       | 46.11    | 1.72           | 0.55  | 3.10 | 1.95E-03 | 3.11E-02 |
| ENSG00000176884 | GRIN1       | 45.75    | 1.15           | 0.33  | 3.45 | 5.52E-04 | 1.33E-02 |
| ENSG00000215018 | COL28A1     | 44.01    | 1.15           | 0.30  | 3.80 | 1.43E-04 | 5.01E-03 |
| ENSG00000179270 | C2orf71     | 43.02    | 1.26           | 0.34  | 3.69 | 2.26E-04 | 6.99E-03 |
| ENSG00000168306 | ACOX2       | 42.44    | 1.32           | 0.43  | 3.04 | 2.36E-03 | 3.47E-02 |
| ENSG00000146250 | PRSS35      | 41.61    | 2.94           | 0.54  | 5.40 | 6.51E-08 | 1.22E-05 |
| ENSG00000280334 | AC009084.2  | 39.37    | 1.27           | 0.31  | 4.14 | 3.44E-05 | 1.75E-03 |
| ENSG00000281106 | TMEM272     | 38.40    | 2.83           | 0.35  | 8.06 | 7.45E-16 | 3.40E-12 |
| ENSG00000256574 | OR13A1      | 38.28    | 1.01           | 0.31  | 3.24 | 1.20E-03 | 2.27E-02 |
| ENSG00000102962 | CCL22       | 37.79    | 3.22           | 0.77  | 4.21 | 2.52E-05 | 1.37E-03 |
| ENSG00000147588 | PMP2        | 34.49    | 4.29           | 0.98  | 4.36 | 1.32E-05 | 8.29E-04 |
| ENSG00000228492 | RAB11FIP1P1 | 34.47    | 1.05           | 0.35  | 2.96 | 3.08E-03 | 4.09E-02 |
| ENSG00000160883 | HK3         | 33.89    | 1.87           | 0.61  | 3.08 | 2.07E-03 | 3.22E-02 |
| ENSG00000105609 | LILRB5      | 33.79    | 1.98           | 0.50  | 3.93 | 8.33E-05 | 3.38E-03 |
| ENSG00000070031 | SCT         | 33.29    | 2.55           | 0.56  | 4.58 | 4.74E-06 | 3.81E-04 |
| ENSG00000232504 | ST3GAL5-AS1 | 32.74    | 1.51           | 0.41  | 3.66 | 2.50E-04 | 7.53E-03 |
| ENSG00000123560 | PLP1        | 32.14    | 3.79           | 0.96  | 3.94 | 8.25E-05 | 3.38E-03 |
| ENSG00000237938 | AL450998.3  | 32.04    | 1.20           | 0.42  | 2.86 | 4.25E-03 | 4.99E-02 |
| ENSG00000178773 | CPNE7       | 31.85    | 1.42           | 0.37  | 3.79 | 1.48E-04 | 5.12E-03 |
| ENSG00000267629 | AC138430.1  | 31.21    | 1.92           | 0.33  | 5.79 | 7.16E-09 | 2.07E-06 |
| ENSG00000149927 | DOC2A       | 30.96    | 1.29           | 0.35  | 3.73 | 1.91E-04 | 6.20E-03 |
| ENSG00000226791 | AC109826.1  | 30.85    | 1.08           | 0.34  | 3.14 | 1.70E-03 | 2.84E-02 |
| ENSG00000159625 | DRC7        | 30.49    | 1.16           | 0.31  | 3.72 | 2.02E-04 | 6.47E-03 |
| ENSG00000172367 | PDZD3       | 29.90    | 1.93           | 0.44  | 4.40 | 1.06E-05 | 7.19E-04 |
| ENSG00000163126 | ANKRD23     | 28.70    | 1.44           | 0.30  | 4.87 | 1.13E-06 | 1.21E-04 |
| ENSG00000137841 | PLCB2       | 28.21    | 1.49           | 0.39  | 3.80 | 1.44E-04 | 5.04E-03 |
| ENSG00000110195 | FOLR1       | 28.17    | 1.97           | 0.66  | 2.98 | 2.92E-03 | 3.96E-02 |
| ENSG00000204577 | LILRB3      | 27.85    | 1.40           | 0.42  | 3.35 | 8.15E-04 | 1.75E-02 |
| ENSG00000000938 | FGR         | 27.75    | 2.51           | 0.87  | 2.91 | 3.65E-03 | 4.56E-02 |
| ENSG00000259668 | AC066613.1  | 26.94    | 1.14           | 0.37  | 3.11 | 1.90E-03 | 3.08E-02 |
| ENSG00000178342 | KCNG2       | 26.83    | 1.65           | 0.43  | 3.88 | 1.06E-04 | 4.00E-03 |
| ENSG00000145040 | UCN2        | 26.73    | 1.79           | 0.62  | 2.88 | 3.94E-03 | 4.78E-02 |
| ENSG00000255035 | SDHCP4      | 26.65    | 1.50           | 0.43  | 3.49 | 4.92E-04 | 1.21E-02 |
| ENSG00000227719 | AC006042.1  | 26.49    | 1.31           | 0.34  | 3.84 | 1.25E-04 | 4.53E-03 |
| ENSG00000186417 | GLDN        | 26.00    | 1.88           | 0.64  | 2.94 | 3.24E-03 | 4.22E-02 |
| ENSG00000174460 | ZCCHC12     | 25.94    | 1.72           | 0.55  | 3.12 | 1.82E-03 | 2.99E-02 |
| ENSG00000130711 | PRDM12      | 25.90    | 1.90           | 0.62  | 3.08 | 2.08E-03 | 3.23E-02 |
| ENSG00000280332 | AC020917.4  | 25.34    | 1.13           | 0.34  | 3.34 | 8.37E-04 | 1.78E-02 |
| ENSG00000213996 | TM6SF2      | 25.28    | 1.11           | 0.35  | 3.16 | 1.56E-03 | 2.70E-02 |
| ENSG00000279300 | AC008761.3  | 25.13    | 1.23           | 0.40  | 3.10 | 1.96E-03 | 3.11E-02 |
| ENSG00000257242 | LINC01619   | 24.65    | 1.16           | 0.38  | 3.06 | 2.18E-03 | 3.33E-02 |
| ENSG00000183691 | NOG         | 24.14    | 2.86           | 0.52  | 5.51 | 3.58E-08 | 7.27E-06 |
| ENSG00000117971 | CHRNA4      | 23.33    | 2.18           | 0.72  | 3.02 | 2.56E-03 | 3.65E-02 |
| ENSG00000152154 | TMEM178A    | 21.28    | 1.22           | 0.35  | 3.48 | 5.06E-04 | 1.24E-02 |
| ENSG00000204121 | ECEL1P1     | 21.09    | 1.43           | 0.41  | 3.47 | 5.28E-04 | 1.29E-02 |
| ENSG00000104321 | TRPA1       | 20.60    | 2.53           | 0.68  | 3.72 | 2.01E-04 | 6.47E-03 |
| ENSG00000213212 | NCLP1       | 20.57    | 1.51           | 0.41  | 3.67 | 2.46E-04 | 7.43E-03 |
| ENSG00000143851 | PTPN7       | 20.53    | 1.17           | 0.38  | 3.09 | 1.99E-03 | 3.14E-02 |
| ENSG00000123454 | DBH         | 19.98    | 1.40           | 0.47  | 2.97 | 3.02E-03 | 4.04E-02 |
| ENSG00000167895 | TMC8        | 19.44    | 1.24           | 0.41  | 3.05 | 2.27E-03 | 3.40E-02 |
| ENSG00000163273 | NPPC        | 19.25    | 1.52           | 0.43  | 3.56 | 3.78E-04 | 9.98E-03 |
| ENSG00000109705 | NKX3-2      | 18.87    | 1.97           | 0.65  | 3.02 | 2.55E-03 | 3.64E-02 |
| ENSG00000165197 | VEGFD       | 17.76    | 1.23           | 0.42  | 2.91 | 3.57E-03 | 4.51E-02 |
| ENSG00000275011 | AC129492.6  | 17.71    | 2.02           | 0.63  | 3.19 | 1.40E-03 | 2.51E-02 |
| ENSG00000272797 | AC092954.1  | 17.53    | 1.75           | 0.45  | 3.90 | 9.61E-05 | 3.73E-03 |
| ENSG00000197816 | CCDC180     | 17.26    | 1.56           | 0.48  | 3.24 | 1.21E-03 | 2.28E-02 |
| ENSG00000254620 | AL050327.1  | 16.90    | 1.37           | 0.47  | 2.91 | 3.60E-03 | 4.52E-02 |
| ENSG00000279989 | AC011815.3  | 15.80    | 1.33           | 0.43  | 3.06 | 2.21E-03 | 3.35E-02 |
| ENSG00000127364 | TAS2R4      | 15.20    | 1.33           | 0.40  | 3.30 | 9.81E-04 | 1.99E-02 |
| ENSG00000100344 | PNPLA3      | 15.04    | 2.22           | 0.52  | 4.30 | 1.69E-05 | 1.01E-03 |
| ENSG00000116652 | DLEU2L      | 15.04    | 1.29           | 0.42  | 3.09 | 2.01E-03 | 3.17E-02 |
| ENSG00000187140 | FOXO3       | 14.53    | 3.82           | 1.12  | 3.41 | 6.47E-04 | 1.50E-02 |
| ENSG00000149534 | MS4A2       | 13.34    | 1.94           | 0.60  | 3.24 | 1.19E-03 | 2.26E-02 |
| ENSG00000230417 | LINC00595   | 13.28    | 1.47           | 0.49  | 3.00 | 2.66E-03 | 3.74E-02 |
| ENSG00000284738 | AL358472.5  | 13.26    | 1.33           | 0.45  | 3.00 | 2.73E-03 | 3.80E-02 |
| ENSG00000259039 | AL161804.1  | 13.14    | 1.66           | 0.44  | 3.75 | 1.76E-04 | 5.83E-03 |
| ENSG00000145794 | MEGF10      | 12.21    | 1.85           | 0.53  | 3.50 | 4.69E-04 | 1.17E-02 |

| Gene stable ID  | Gene name  | baseMean | log2FoldChange | lfcSE | stat | pvalue   | padj     |
|-----------------|------------|----------|----------------|-------|------|----------|----------|
| ENSG00000267577 | AC010327.3 | 12.10    | 1.51           | 0.50  | 3.05 | 2.27E-03 | 3.40E-02 |
| ENSG00000146013 | GFRA3      | 12.01    | 2.75           | 0.93  | 2.95 | 3.16E-03 | 4.16E-02 |
| ENSG00000142619 | PADI3      | 11.73    | 2.96           | 0.87  | 3.39 | 6.90E-04 | 1.57E-02 |
| ENSG00000188869 | TMC3       | 11.55    | 2.00           | 0.61  | 3.29 | 9.87E-04 | 1.99E-02 |
| ENSG00000248367 | AC008610.1 | 11.33    | 1.71           | 0.48  | 3.59 | 3.31E-04 | 9.08E-03 |
| ENSG00000224713 | AC025165.1 | 11.24    | 1.60           | 0.46  | 3.46 | 5.47E-04 | 1.33E-02 |
| ENSG00000223947 | AC016738.1 | 11.13    | 1.58           | 0.49  | 3.25 | 1.14E-03 | 2.20E-02 |
| ENSG00000165178 | NCF1C      | 10.97    | 1.82           | 0.53  | 3.46 | 5.50E-04 | 1.33E-02 |
| ENSG00000129910 | CDH15      | 10.79    | 4.05           | 1.13  | 3.58 | 3.47E-04 | 9.39E-03 |
| ENSG00000279294 | AC092135.1 | 10.52    | 2.50           | 0.67  | 3.71 | 2.10E-04 | 6.68E-03 |
| ENSG00000279419 | AC004925.1 | 10.21    | 1.69           | 0.57  | 2.97 | 3.01E-03 | 4.04E-02 |
| ENSG00000166104 | AC126323.1 | 10.20    | 2.08           | 0.68  | 3.05 | 2.29E-03 | 3.42E-02 |
| ENSG00000171101 | SIGLEC17P  | 10.11    | 3.45           | 0.78  | 4.44 | 8.81E-06 | 6.21E-04 |
| ENSG00000226380 | AC016831.1 | 10.06    | 1.58           | 0.53  | 2.96 | 3.10E-03 | 4.10E-02 |
| ENSG00000118113 | MMP8       | 9.96     | 3.18           | 1.05  | 3.03 | 2.46E-03 | 3.55E-02 |
| ENSG00000243499 | RPS6P21    | 9.88     | 2.52           | 0.75  | 3.38 | 7.27E-04 | 1.62E-02 |
| ENSG00000250644 | AC068580.4 | 9.63     | 1.96           | 0.66  | 2.97 | 2.96E-03 | 4.00E-02 |
| ENSG00000272564 | AC012511.1 | 9.57     | 1.87           | 0.56  | 3.36 | 7.78E-04 | 1.70E-02 |
| ENSG00000182508 | LHFPL1     | 9.47     | 1.85           | 0.59  | 3.15 | 1.63E-03 | 2.76E-02 |
| ENSG00000265962 | GACAT2     | 9.10     | 1.77           | 0.55  | 3.21 | 1.35E-03 | 2.44E-02 |
| ENSG00000255837 | TAS2R20    | 8.47     | 1.89           | 0.66  | 2.87 | 4.04E-03 | 4.85E-02 |

B) Differentially expressed genes reduced in pseudoislets when compared to islets (>2-fold, padj<0.05).

| Gene stable ID   | Gene name | baseMean | log2FoldChange | lfcSE | stat  | pvalue   | padj     |
|------------------|-----------|----------|----------------|-------|-------|----------|----------|
| ENSG00000184009  | ACTG1     | 40021.50 | -1.14          | 0.26  | -4.40 | 1.08E-05 | 7.27E-04 |
| ENSG00000100345  | MYH9      | 20638.48 | -1.03          | 0.21  | -4.90 | 9.67E-07 | 1.07E-04 |
| ENSG00000167552  | TUBA1A    | 17542.41 | -1.02          | 0.28  | -3.71 | 2.11E-04 | 6.68E-03 |
| ENSG00000115386  | REG1A     | 13255.76 | -4.36          | 1.07  | -4.09 | 4.36E-05 | 2.06E-03 |
| ENSG00000196924  | FLNA      | 10398.31 | -1.07          | 0.35  | -3.02 | 2.53E-03 | 3.63E-02 |
| ENSG00000187498  | COL4A1    | 10087.86 | -1.30          | 0.36  | -3.62 | 2.99E-04 | 8.53E-03 |
| ENSG00000275896  | PRSS2     | 8384.77  | -3.86          | 1.09  | -3.54 | 4.04E-04 | 1.05E-02 |
| ENSG00000196230  | TUBB      | 8055.82  | -1.20          | 0.17  | -7.05 | 1.80E-12 | 1.64E-09 |
| ENSG00000111669  | TP1       | 7693.80  | -1.09          | 0.24  | -4.60 | 4.25E-06 | 3.46E-04 |
| ENSG00000198959  | TGM2      | 7198.19  | -2.09          | 0.43  | -4.85 | 1.26E-06 | 1.28E-04 |
| ENSG00000152952  | PLOD2     | 7135.74  | -1.53          | 0.35  | -4.39 | 1.12E-05 | 7.35E-04 |
| ENSG00000172023  | REG1B     | 6652.22  | -8.03          | 1.10  | -7.27 | 3.49E-13 | 3.75E-10 |
| ENSG00000129757  | CDKN1C    | 5961.10  | -1.06          | 0.21  | -4.95 | 7.58E-07 | 8.93E-05 |
| ENSG00000134333  | LDHA      | 5530.08  | -2.05          | 0.39  | -5.20 | 1.96E-07 | 2.88E-05 |
| ENSG00000058085  | LAMC2     | 5127.70  | -1.86          | 0.51  | -3.63 | 2.86E-04 | 8.26E-03 |
| ENSG00000171992  | SYNPO     | 5058.94  | -1.01          | 0.27  | -3.77 | 1.66E-04 | 5.56E-03 |
| ENSG00000147065  | MSN       | 4302.44  | -1.06          | 0.29  | -3.60 | 3.19E-04 | 8.91E-03 |
| ENSG00000204983  | PRSS1     | 4019.76  | -4.41          | 1.12  | -3.93 | 8.53E-05 | 3.41E-03 |
| ENSG00000188229  | TUBB4B    | 3664.29  | -1.10          | 0.19  | -5.86 | 4.55E-09 | 1.48E-06 |
| ENSG00000106366  | SERPINE1  | 3625.73  | -1.50          | 0.48  | -3.11 | 1.87E-03 | 3.04E-02 |
| ENSG00000171223  | JUNB      | 3338.35  | -1.18          | 0.29  | -4.13 | 3.66E-05 | 1.83E-03 |
| ENSG00000184489  | PTP4A3    | 3232.54  | -1.93          | 0.37  | -5.18 | 2.19E-07 | 3.12E-05 |
| ENSG00000091704  | CPA1      | 3112.43  | -5.40          | 1.26  | -4.29 | 1.76E-05 | 1.04E-03 |
| ENSG00000164266  | SPINK1    | 2900.40  | -2.28          | 0.51  | -4.47 | 7.79E-06 | 5.62E-04 |
| ENSG00000197930  | ERO1A     | 2895.11  | -1.01          | 0.32  | -3.13 | 1.74E-03 | 2.90E-02 |
| ENSG00000142789  | CELA3A    | 2894.08  | -6.37          | 1.61  | -3.95 | 7.86E-05 | 3.25E-03 |
| ENSG00000137331  | IER3      | 2782.01  | -1.08          | 0.30  | -3.56 | 3.70E-04 | 9.85E-03 |
| ENSG00000116690  | PRG4      | 2762.13  | -1.44          | 0.41  | -3.50 | 4.58E-04 | 1.15E-02 |
| ENSG00000075240  | GRAMD4    | 2536.98  | -1.37          | 0.27  | -5.04 | 4.73E-07 | 5.95E-05 |
| ENSG00000134107  | BHLHE40   | 2506.51  | -1.42          | 0.25  | -5.60 | 2.14E-08 | 4.89E-06 |
| ENSG00000168928  | CTRB2     | 2308.21  | -5.24          | 1.06  | -4.93 | 8.38E-07 | 9.56E-05 |
| ENSG00000130300  | PLVAP     | 2247.27  | -2.18          | 0.46  | -4.71 | 2.47E-06 | 2.16E-04 |
| ENSG00000131016  | AKAP12    | 2204.31  | -1.05          | 0.27  | -3.93 | 8.44E-05 | 3.39E-03 |
| ENSG00000178726  | THBD      | 1877.19  | -1.01          | 0.23  | -4.48 | 7.47E-06 | 5.46E-04 |
| ENSG00000122884  | P4HA1     | 1811.45  | -1.16          | 0.24  | -4.86 | 1.16E-06 | 1.21E-04 |
| ENSG00000185043  | CIB1      | 1781.03  | -1.01          | 0.28  | -3.61 | 3.10E-04 | 8.78E-03 |
| ENSG00000175535  | PNLIP     | 1687.06  | -3.77          | 0.85  | -4.41 | 1.04E-05 | 7.05E-04 |
| ENSG00000159167  | STC1      | 1676.70  | -1.63          | 0.54  | -3.01 | 2.60E-03 | 3.69E-02 |
| ENSG00000100906  | NFKBIA    | 1507.93  | -1.56          | 0.46  | -3.39 | 6.94E-04 | 1.57E-02 |
| ENSG00000153002  | CPB1      | 1489.95  | -4.22          | 0.79  | -5.35 | 8.98E-08 | 1.53E-05 |
| ENSG00000125148  | MT2A      | 1452.02  | -2.59          | 0.74  | -3.50 | 4.64E-04 | 1.16E-02 |
| ENSG00000120738  | EGR1      | 1425.32  | -2.13          | 0.49  | -4.37 | 1.21E-05 | 7.86E-04 |
| ENSG00000164949  | GEM       | 1413.81  | -1.23          | 0.27  | -4.48 | 7.32E-06 | 5.37E-04 |
| ENSG000000071282 | LMCD1     | 1413.29  | -1.22          | 0.26  | -4.70 | 2.55E-06 | 2.21E-04 |
| ENSG00000112769  | LAMA4     | 1323.16  | -1.19          | 0.29  | -4.09 | 4.37E-05 | 2.06E-03 |
| ENSG00000125810  | CD93      | 1266.99  | -2.95          | 0.39  | -7.53 | 4.91E-14 | 1.01E-10 |
| ENSG00000128567  | PODXL     | 1235.44  | -2.49          | 0.34  | -7.40 | 1.41E-13 | 1.96E-10 |
| ENSG00000102755  | FLT1      | 1227.91  | -2.46          | 0.43  | -5.76 | 8.60E-09 | 2.38E-06 |
| ENSG00000204054  | LINC00963 | 1179.78  | -1.16          | 0.32  | -3.58 | 3.48E-04 | 9.40E-03 |
| ENSG00000157557  | ETS2      | 1166.26  | -1.29          | 0.38  | -3.42 | 6.38E-04 | 1.49E-02 |
| ENSG00000101384  | JAG1      | 1152.42  | -1.33          | 0.33  | -3.98 | 6.98E-05 | 2.97E-03 |
| ENSG00000261371  | PECAM1    | 1101.33  | -1.76          | 0.39  | -4.51 | 6.40E-06 | 4.89E-04 |
| ENSG00000138161  | CUZD1     | 1055.20  | -5.24          | 1.10  | -4.75 | 2.04E-06 | 1.87E-04 |
| ENSG00000158516  | CPA2      | 1050.84  | -4.08          | 0.98  | -4.15 | 3.28E-05 | 1.68E-03 |
| ENSG00000170835  | CEL       | 1032.14  | -4.71          | 1.11  | -4.25 | 2.09E-05 | 1.17E-03 |
| ENSG00000162849  | KIF26B    | 969.67   | -1.08          | 0.24  | -4.55 | 5.44E-06 | 4.29E-04 |
| ENSG00000137392  | CLPS      | 966.98   | -9.17          | 1.98  | -4.63 | 3.69E-06 | 3.11E-04 |
| ENSG00000170890  | PLA2G1B   | 962.00   | -5.84          | 1.15  | -5.09 | 3.64E-07 | 4.85E-05 |
| ENSG00000128342  | LIF       | 896.68   | -1.85          | 0.55  | -3.37 | 7.42E-04 | 1.64E-02 |
| ENSG00000165434  | PGM2L1    | 889.61   | -1.13          | 0.31  | -3.62 | 2.97E-04 | 8.49E-03 |
| ENSG00000099860  | GADD45B   | 860.77   | -1.84          | 0.45  | -4.06 | 4.83E-05 | 2.23E-03 |
| ENSG00000115107  | STEAP3    | 839.81   | -2.16          | 0.33  | -6.45 | 1.11E-10 | 6.36E-08 |
| ENSG00000162438  | CTRC      | 836.53   | -6.20          | 1.27  | -4.86 | 1.15E-06 | 1.21E-04 |
| ENSG00000152661  | GJA1      | 816.60   | -1.04          | 0.29  | -3.56 | 3.65E-04 | 9.77E-03 |
| ENSG00000163909  | HEYL      | 816.03   | -1.45          | 0.38  | -3.86 | 1.12E-04 | 4.17E-03 |
| ENSG00000110723  | EXPH5     | 802.56   | -1.02          | 0.20  | -5.13 | 2.89E-07 | 3.94E-05 |
| ENSG00000219073  | CELA3B    | 777.79   | -7.63          | 1.45  | -5.28 | 1.28E-07 | 2.07E-05 |
| ENSG00000060138  | YBX3      | 768.18   | -1.39          | 0.43  | -3.21 | 1.34E-03 | 2.44E-02 |
| ENSG00000113916  | BCL6      | 741.50   | -1.04          | 0.28  | -3.71 | 2.04E-04 | 6.53E-03 |
| ENSG00000128052  | KDR       | 741.32   | -2.57          | 0.31  | -8.24 | 1.75E-16 | 1.07E-12 |
| ENSG00000176014  | TUBB6     | 737.64   | -1.84          | 0.30  | -6.18 | 6.30E-10 | 2.74E-07 |
| ENSG00000008517  | IL32      | 712.98   | -1.72          | 0.49  | -3.49 | 4.77E-04 | 1.18E-02 |
| ENSG00000168209  | DDIT4     | 712.93   | -1.10          | 0.33  | -3.30 | 9.65E-04 | 1.97E-02 |
| ENSG00000184557  | SOCS3     | 697.44   | -2.33          | 0.45  | -5.21 | 1.85E-07 | 2.79E-05 |
| ENSG00000158859  | ADAMTS4   | 693.92   | -1.77          | 0.39  | -4.59 | 4.40E-06 | 3.55E-04 |
| ENSG00000172016  | REG3A     | 681.21   | -2.90          | 0.96  | -3.03 | 2.43E-03 | 3.54E-02 |
| ENSG00000110799  | VWF       | 660.59   | -2.14          | 0.54  | -3.99 | 6.71E-05 | 2.89E-03 |
| ENSG00000105974  | CAV1      | 658.54   | -1.46          | 0.38  | -3.82 | 1.35E-04 | 4.80E-03 |
| ENSG00000168925  | CTRB1     | 654.55   | -5.01          | 1.29  | -3.88 | 1.07E-04 | 4.00E-03 |
| ENSG00000169715  | MT1E      | 628.79   | -2.91          | 0.72  | -4.02 | 5.83E-05 | 2.58E-03 |
| ENSG00000111145  | ELK3      | 602.11   | -1.18          | 0.35  | -3.41 | 6.39E-04 | 1.49E-02 |
| ENSG00000090339  | ICAM1     | 581.21   | -1.24          | 0.42  | -2.93 | 3.43E-03 | 4.37E-02 |
| ENSG00000151617  | EDNRA     | 573.80   | -1.31          | 0.21  | -6.19 | 6.02E-10 | 2.68E-07 |
| ENSG00000118515  | SGK1      | 570.85   | -1.18          | 0.29  | -4.11 | 3.92E-05 | 1.91E-03 |
| ENSG00000069122  | ADGRF5    | 553.78   | -2.05          | 0.35  | -5.94 | 2.82E-09 | 1.01E-06 |
| ENSG00000154734  | ADAMTS1   | 551.86   | -1.79          | 0.53  | -3.38 | 7.38E-04 | 1.64E-02 |
| ENSG00000167772  | ANGPTL4   | 544.55   | -2.06          | 0.36  | -5.67 | 1.39E-08 | 3.51E-06 |
| ENSG00000164283  | ESM1      | 526.31   | -2.84          | 0.44  | -6.43 | 1.26E-10 | 6.99E-08 |
| ENSG00000127533  | F2RL3     | 511.39   | -1.80          | 0.44  | -4.04 | 5.29E-05 | 2.38E-03 |

| Gene stable ID  | Gene name  | baseMean | log2FoldChange | lfcSE | stat   | pvalue   | padj     |
|-----------------|------------|----------|----------------|-------|--------|----------|----------|
| ENSG00000187021 | PNLIPRP1   | 496.62   | -4.42          | 1.02  | -4.32  | 1.59E-05 | 9.61E-04 |
| ENSG00000141639 | MAPK4      | 473.89   | -1.15          | 0.32  | -3.64  | 2.77E-04 | 8.08E-03 |
| ENSG00000025708 | TYMP       | 473.32   | -1.02          | 0.22  | -4.71  | 2.42E-06 | 2.14E-04 |
| ENSG00000175197 | DDIT3      | 472.28   | -1.13          | 0.38  | -2.93  | 3.37E-03 | 4.32E-02 |
| ENSG00000185022 | MAFF       | 469.69   | -1.16          | 0.38  | -3.00  | 2.67E-03 | 3.74E-02 |
| ENSG00000171564 | FGF        | 468.25   | -2.74          | 0.46  | -5.92  | 3.19E-09 | 1.12E-06 |
| ENSG00000060982 | BCAT1      | 453.29   | -1.42          | 0.21  | -6.63  | 3.35E-11 | 2.35E-08 |
| ENSG00000162407 | PLPP3      | 449.81   | -1.49          | 0.26  | -5.72  | 1.07E-08 | 2.83E-06 |
| ENSG00000221869 | CEBPD      | 439.08   | -1.85          | 0.25  | -7.43  | 1.12E-13 | 1.70E-10 |
| ENSG00000185567 | AHNAK2     | 437.85   | -1.11          | 0.15  | -7.53  | 5.00E-14 | 1.01E-10 |
| ENSG00000100311 | PDGFB      | 432.98   | -1.62          | 0.23  | -7.02  | 2.20E-12 | 1.83E-09 |
| ENSG00000173110 | HSPA6      | 428.50   | -4.47          | 0.84  | -5.30  | 1.14E-07 | 1.92E-05 |
| ENSG00000069188 | SDK2       | 411.19   | -1.07          | 0.16  | -6.76  | 1.42E-11 | 1.04E-08 |
| ENSG00000180198 | RCC1       | 409.57   | -1.10          | 0.25  | -4.35  | 1.36E-05 | 8.46E-04 |
| ENSG00000198417 | MT1F       | 407.52   | -2.05          | 0.54  | -3.78  | 1.58E-04 | 5.40E-03 |
| ENSG00000139567 | ACVRL1     | 403.65   | -1.84          | 0.37  | -4.93  | 8.07E-07 | 9.39E-05 |
| ENSG00000137101 | CD72       | 401.37   | -1.01          | 0.20  | -5.13  | 2.83E-07 | 3.92E-05 |
| ENSG00000176473 | WDR25      | 398.78   | -1.15          | 0.26  | -4.39  | 1.12E-05 | 7.35E-04 |
| ENSG00000148926 | ADM        | 388.85   | -1.58          | 0.45  | -3.50  | 4.57E-04 | 1.15E-02 |
| ENSG00000187193 | MT1X       | 387.42   | -2.51          | 0.56  | -4.48  | 7.53E-06 | 5.48E-04 |
| ENSG00000143954 | REG3G      | 378.79   | -4.95          | 1.72  | -2.89  | 3.91E-03 | 4.74E-02 |
| ENSG00000057657 | PRDM1      | 349.81   | -1.20          | 0.32  | -3.70  | 2.12E-04 | 6.69E-03 |
| ENSG00000125144 | MT1G       | 349.64   | -4.13          | 0.85  | -4.85  | 1.25E-06 | 1.27E-04 |
| ENSG00000172602 | RND1       | 348.45   | -1.46          | 0.40  | -3.65  | 2.61E-04 | 7.76E-03 |
| ENSG00000112936 | C7         | 347.92   | -3.78          | 0.94  | -4.03  | 5.53E-05 | 2.46E-03 |
| ENSG00000091879 | ANGPT2     | 313.27   | -2.60          | 0.26  | -10.08 | 6.82E-24 | 6.23E-20 |
| ENSG00000064666 | CNN2       | 306.39   | -1.09          | 0.34  | -3.16  | 1.56E-03 | 2.70E-02 |
| ENSG00000137558 | PI15       | 297.03   | -3.06          | 0.47  | -6.48  | 9.20E-11 | 5.61E-08 |
| ENSG00000010438 | PRSS3      | 294.11   | -1.51          | 0.42  | -3.59  | 3.25E-04 | 8.98E-03 |
| ENSG00000162618 | ADGRL4     | 291.06   | -2.38          | 0.42  | -5.72  | 1.06E-08 | 2.83E-06 |
| ENSG00000149564 | ESAM       | 284.56   | -2.09          | 0.40  | -5.27  | 1.40E-07 | 2.18E-05 |
| ENSG00000152689 | RASGRP3    | 276.28   | -1.58          | 0.33  | -4.86  | 1.15E-06 | 1.21E-04 |
| ENSG00000001617 | SEMA3F     | 275.55   | -1.47          | 0.35  | -4.24  | 2.19E-05 | 1.22E-03 |
| ENSG00000185633 | NDUFA4L2   | 275.08   | -2.41          | 0.32  | -7.44  | 1.02E-13 | 1.69E-10 |
| ENSG00000204301 | NOTCH4     | 267.40   | -1.77          | 0.41  | -4.28  | 1.85E-05 | 1.07E-03 |
| ENSG00000131634 | TMEM204    | 264.99   | -1.14          | 0.35  | -3.27  | 1.09E-03 | 2.14E-02 |
| ENSG00000136997 | MYC        | 244.94   | -2.18          | 0.49  | -4.49  | 7.11E-06 | 5.24E-04 |
| ENSG00000184584 | TMEM173    | 244.28   | -1.05          | 0.26  | -4.04  | 5.38E-05 | 2.41E-03 |
| ENSG00000137496 | IL18BP     | 237.70   | -1.22          | 0.32  | -3.82  | 1.34E-04 | 4.77E-03 |
| ENSG00000198873 | GRK5       | 237.26   | -1.00          | 0.28  | -3.56  | 3.68E-04 | 9.81E-03 |
| ENSG00000135842 | FAM129A    | 237.23   | -1.13          | 0.37  | -3.05  | 2.28E-03 | 3.42E-02 |
| ENSG00000127329 | PTPRB      | 234.27   | -2.07          | 0.50  | -4.14  | 3.52E-05 | 1.78E-03 |
| ENSG00000119630 | PGF        | 234.22   | -1.68          | 0.27  | -6.15  | 7.52E-10 | 3.12E-07 |
| ENSG00000173269 | MMRN2      | 232.71   | -2.32          | 0.40  | -5.80  | 6.75E-09 | 2.02E-06 |
| ENSG00000066056 | TIE1       | 228.30   | -2.06          | 0.45  | -4.57  | 4.81E-06 | 3.85E-04 |
| ENSG00000167747 | C19orf48   | 225.13   | -1.05          | 0.31  | -3.41  | 6.40E-04 | 1.49E-02 |
| ENSG00000123689 | G0S2       | 217.16   | -1.62          | 0.41  | -3.93  | 8.52E-05 | 3.41E-03 |
| ENSG00000171560 | FGA        | 216.83   | -2.61          | 0.60  | -4.38  | 1.19E-05 | 7.74E-04 |
| ENSG00000185338 | SOCS1      | 215.79   | -1.90          | 0.42  | -4.56  | 5.16E-06 | 4.12E-04 |
| ENSG00000120318 | ARAP3      | 213.51   | -1.06          | 0.32  | -3.32  | 8.89E-04 | 1.85E-02 |
| ENSG00000171557 | FGG        | 213.16   | -2.95          | 0.55  | -5.36  | 8.50E-08 | 1.49E-05 |
| ENSG00000142615 | CELA2A     | 211.61   | -6.00          | 1.24  | -4.83  | 1.37E-06 | 1.38E-04 |
| ENSG00000154175 | ABI3BP     | 210.88   | -1.30          | 0.29  | -4.55  | 5.31E-06 | 4.21E-04 |
| ENSG00000162433 | AK4        | 207.62   | -1.95          | 0.36  | -5.43  | 5.71E-08 | 1.09E-05 |
| ENSG00000135636 | DYSF       | 203.69   | -1.72          | 0.41  | -4.17  | 3.09E-05 | 1.60E-03 |
| ENSG00000102760 | RGCC       | 200.06   | -1.75          | 0.27  | -6.48  | 9.22E-11 | 5.61E-08 |
| ENSG00000102802 | MEDAG      | 190.55   | -1.52          | 0.46  | -3.28  | 1.03E-03 | 2.05E-02 |
| ENSG00000064989 | CALCRL     | 188.29   | -1.90          | 0.34  | -5.67  | 1.41E-08 | 3.51E-06 |
| ENSG00000266200 | PNLIPRP2   | 186.25   | -2.83          | 0.99  | -2.86  | 4.19E-03 | 4.94E-02 |
| ENSG00000174640 | SLCO2A1    | 185.68   | -1.95          | 0.40  | -4.90  | 9.37E-07 | 1.06E-04 |
| ENSG00000091513 | TF         | 184.67   | -4.38          | 0.96  | -4.54  | 5.51E-06 | 4.31E-04 |
| ENSG00000197279 | ZNF165     | 183.33   | -1.46          | 0.44  | -3.30  | 9.71E-04 | 1.98E-02 |
| ENSG00000161940 | BCL6B      | 183.07   | -2.29          | 0.48  | -4.81  | 1.49E-06 | 1.47E-04 |
| ENSG00000061337 | LZTS1      | 183.03   | -1.49          | 0.41  | -3.65  | 2.60E-04 | 7.74E-03 |
| ENSG00000157554 | ERG        | 179.18   | -2.12          | 0.43  | -4.95  | 7.48E-07 | 8.87E-05 |
| ENSG00000144476 | ACKR3      | 176.47   | -1.67          | 0.38  | -4.38  | 1.18E-05 | 7.66E-04 |
| ENSG00000170989 | S1PR1      | 174.92   | -1.99          | 0.47  | -4.20  | 2.66E-05 | 1.43E-03 |
| ENSG00000113555 | PCDH12     | 172.71   | -1.15          | 0.24  | -4.71  | 2.50E-06 | 2.17E-04 |
| ENSG00000115602 | IL1RL1     | 167.90   | -5.05          | 1.33  | -3.81  | 1.41E-04 | 4.96E-03 |
| ENSG00000247095 | MIR210HG   | 165.43   | -1.97          | 0.32  | -6.24  | 4.51E-10 | 2.17E-07 |
| ENSG00000167748 | KLK1       | 165.06   | -5.71          | 1.05  | -5.43  | 5.51E-08 | 1.06E-05 |
| ENSG00000179776 | CDH5       | 165.02   | -2.23          | 0.57  | -3.91  | 9.30E-05 | 3.62E-03 |
| ENSG00000077942 | FBLN1      | 164.64   | -1.91          | 0.34  | -5.64  | 1.75E-08 | 4.20E-06 |
| ENSG00000138792 | ENPEP      | 163.63   | -1.25          | 0.32  | -3.83  | 1.26E-04 | 4.57E-03 |
| ENSG00000154133 | ROBO4      | 161.98   | -2.64          | 0.43  | -6.20  | 5.53E-10 | 2.52E-07 |
| ENSG00000109511 | ANXA10     | 158.76   | -1.43          | 0.49  | -2.90  | 3.72E-03 | 4.61E-02 |
| ENSG00000197905 | TEAD4      | 158.55   | -2.20          | 0.41  | -5.33  | 9.83E-08 | 1.66E-05 |
| ENSG00000100979 | PLTP       | 156.42   | -1.11          | 0.29  | -3.88  | 1.04E-04 | 3.97E-03 |
| ENSG00000101445 | PPP1R16B   | 154.86   | -1.71          | 0.28  | -6.09  | 1.11E-09 | 4.31E-07 |
| ENSG00000184613 | NELL2      | 152.72   | -1.63          | 0.48  | -3.42  | 6.16E-04 | 1.45E-02 |
| ENSG00000129521 | EGLN3      | 152.66   | -1.58          | 0.41  | -3.87  | 1.10E-04 | 4.09E-03 |
| ENSG00000074660 | SCARF1     | 152.35   | -1.36          | 0.28  | -4.88  | 1.05E-06 | 1.14E-04 |
| ENSG00000273038 | AL365203.2 | 149.39   | -1.26          | 0.40  | -3.17  | 1.51E-03 | 2.63E-02 |
| ENSG00000179751 | SYCN       | 147.71   | -6.70          | 1.47  | -4.55  | 5.45E-06 | 4.29E-04 |
| ENSG00000104332 | SFRP1      | 146.20   | -2.63          | 0.59  | -4.47  | 7.78E-06 | 5.62E-04 |
| ENSG00000217801 | AL390719.1 | 145.10   | -1.26          | 0.38  | -3.35  | 8.08E-04 | 1.75E-02 |
| ENSG00000244067 | GSTA2      | 144.43   | -2.04          | 0.56  | -3.67  | 2.43E-04 | 7.40E-03 |
| ENSG00000183386 | FHL3       | 142.49   | -1.22          | 0.35  | -3.51  | 4.50E-04 | 1.14E-02 |
| ENSG00000037280 | FLT4       | 139.30   | -2.16          | 0.49  | -4.42  | 9.84E-06 | 6.73E-04 |

| Gene stable ID  | Gene name  | baseMean | log2FoldChange | lfcSE | stat  | pvalue   | padj     |
|-----------------|------------|----------|----------------|-------|-------|----------|----------|
| ENSG00000107562 | CXCL12     | 138.66   | -1.80          | 0.42  | -4.33 | 1.49E-05 | 9.16E-04 |
| ENSG00000141540 | TTYH2      | 138.30   | -1.01          | 0.33  | -3.02 | 2.53E-03 | 3.63E-02 |
| ENSG00000162654 | GBPA       | 137.10   | -1.33          | 0.43  | -3.12 | 1.79E-03 | 2.96E-02 |
| ENSG00000125740 | FOSB       | 136.75   | -2.98          | 0.66  | -4.50 | 6.93E-06 | 5.14E-04 |
| ENSG00000167244 | IGF2       | 136.67   | -2.15          | 0.31  | -7.00 | 2.53E-12 | 2.01E-09 |
| ENSG00000103710 | RASL12     | 134.91   | -1.96          | 0.36  | -5.40 | 6.83E-08 | 1.25E-05 |
| ENSG00000154783 | FGD5       | 131.39   | -1.33          | 0.42  | -3.16 | 1.58E-03 | 2.71E-02 |
| ENSG00000164330 | EBF1       | 130.58   | -1.02          | 0.30  | -3.35 | 7.97E-04 | 1.73E-02 |
| ENSG00000077348 | EXOSC5     | 130.29   | -1.24          | 0.28  | -4.37 | 1.25E-05 | 7.97E-04 |
| ENSG00000157510 | AFAF1L1    | 130.13   | -1.58          | 0.37  | -4.26 | 2.02E-05 | 1.14E-03 |
| ENSG00000185615 | PDIA2      | 128.04   | -2.74          | 0.92  | -2.98 | 2.91E-03 | 3.96E-02 |
| ENSG00000116014 | KISS1R     | 124.90   | -1.49          | 0.40  | -3.69 | 2.24E-04 | 6.96E-03 |
| ENSG00000177464 | GPR4       | 124.30   | -2.39          | 0.39  | -6.10 | 1.06E-09 | 4.20E-07 |
| ENSG00000116852 | KIF21B     | 123.17   | -1.06          | 0.30  | -3.56 | 3.78E-04 | 9.98E-03 |
| ENSG00000017483 | SLC38A5    | 122.02   | -2.98          | 0.61  | -4.89 | 9.96E-07 | 1.10E-04 |
| ENSG00000104760 | FGL1       | 121.93   | -1.72          | 0.48  | -3.60 | 3.22E-04 | 8.96E-03 |
| ENSG00000165379 | LRFN5      | 115.79   | -1.06          | 0.28  | -3.73 | 1.91E-04 | 6.20E-03 |
| ENSG00000184156 | KCNQ3      | 113.25   | -1.49          | 0.40  | -3.76 | 1.71E-04 | 5.71E-03 |
| ENSG00000113763 | UNC5A      | 111.05   | -1.05          | 0.28  | -3.75 | 1.79E-04 | 5.89E-03 |
| ENSG00000283632 | EXOC3L2    | 111.01   | -2.23          | 0.38  | -5.91 | 3.43E-09 | 1.18E-06 |
| ENSG00000107159 | CA9        | 109.71   | -3.73          | 1.20  | -3.10 | 1.95E-03 | 3.11E-02 |
| ENSG00000105538 | RASIP1     | 100.17   | -1.65          | 0.31  | -5.27 | 1.40E-07 | 2.18E-05 |
| ENSG00000184497 | TMEM255B   | 99.45    | -1.60          | 0.34  | -4.65 | 3.35E-06 | 2.84E-04 |
| ENSG00000171388 | APLN       | 98.01    | -2.36          | 0.51  | -4.61 | 3.98E-06 | 3.32E-04 |
| ENSG00000176435 | CLEC14A    | 97.05    | -2.19          | 0.49  | -4.45 | 8.53E-06 | 6.06E-04 |
| ENSG00000198844 | ARHGEF15   | 92.65    | -1.35          | 0.45  | -2.98 | 2.85E-03 | 3.90E-02 |
| ENSG00000120156 | TEK        | 91.56    | -2.20          | 0.40  | -5.45 | 5.08E-08 | 9.97E-06 |
| ENSG00000164867 | NOS3       | 91.42    | -1.53          | 0.41  | -3.69 | 2.21E-04 | 6.90E-03 |
| ENSG00000204161 | TMEM273    | 90.93    | -1.43          | 0.29  | -4.87 | 1.12E-06 | 1.20E-04 |
| ENSG00000133561 | GIMAP6     | 90.43    | -1.84          | 0.54  | -3.43 | 6.00E-04 | 1.43E-02 |
| ENSG00000237372 | AL606807.1 | 89.87    | -2.53          | 0.32  | -7.79 | 6.74E-15 | 1.76E-11 |
| ENSG00000003137 | CYP26B1    | 87.74    | -1.61          | 0.36  | -4.42 | 9.69E-06 | 6.70E-04 |
| ENSG00000230882 | AC005077.4 | 86.02    | -1.07          | 0.27  | -3.96 | 7.56E-05 | 3.16E-03 |
| ENSG00000124731 | TREM1      | 86.02    | -3.01          | 0.75  | -4.00 | 6.44E-05 | 2.79E-03 |
| ENSG00000170323 | FABP4      | 82.64    | -1.98          | 0.65  | -3.06 | 2.24E-03 | 3.38E-02 |
| ENSG00000119919 | NKX2-3     | 82.30    | -1.61          | 0.50  | -3.24 | 1.18E-03 | 2.25E-02 |
| ENSG00000166148 | AVPR1A     | 81.46    | -1.88          | 0.36  | -5.21 | 1.89E-07 | 2.81E-05 |
| ENSG00000211448 | DIO2       | 81.45    | -1.77          | 0.39  | -4.51 | 6.38E-06 | 4.89E-04 |
| ENSG00000095587 | TLL2       | 80.31    | -1.93          | 0.33  | -5.89 | 3.97E-09 | 1.32E-06 |
| ENSG00000163132 | MSX1       | 79.59    | -1.06          | 0.37  | -2.88 | 4.03E-03 | 4.84E-02 |
| ENSG00000136630 | HLX        | 79.45    | -1.37          | 0.24  | -5.67 | 1.42E-08 | 3.51E-06 |
| ENSG00000130755 | GMFG       | 76.82    | -1.19          | 0.32  | -3.77 | 1.65E-04 | 5.56E-03 |
| ENSG00000171208 | NETO2      | 74.71    | -1.19          | 0.33  | -3.64 | 2.69E-04 | 7.94E-03 |
| ENSG00000160111 | CPAMD8     | 73.58    | -1.40          | 0.45  | -3.10 | 1.96E-03 | 3.11E-02 |
| ENSG00000114771 | AADAC      | 73.28    | -4.03          | 1.04  | -3.87 | 1.07E-04 | 4.00E-03 |
| ENSG00000137672 | TRPC6      | 72.42    | -1.93          | 0.26  | -7.37 | 1.65E-13 | 2.00E-10 |
| ENSG00000166558 | SLC38A8    | 70.56    | -1.87          | 0.47  | -4.00 | 6.34E-05 | 2.77E-03 |
| ENSG00000198342 | ZNF442     | 70.40    | -1.01          | 0.28  | -3.61 | 3.05E-04 | 8.65E-03 |
| ENSG00000179772 | FOXO1      | 69.65    | -2.34          | 0.49  | -4.75 | 2.08E-06 | 1.87E-04 |
| ENSG00000187800 | PEAR1      | 69.24    | -1.44          | 0.38  | -3.83 | 1.26E-04 | 4.57E-03 |
| ENSG00000054598 | FOXC1      | 68.59    | -1.17          | 0.32  | -3.71 | 2.10E-04 | 6.68E-03 |
| ENSG00000189377 | CXCL17     | 68.08    | -2.97          | 0.83  | -3.59 | 3.34E-04 | 9.12E-03 |
| ENSG00000227218 | AL157935.1 | 64.02    | -1.00          | 0.27  | -3.71 | 2.10E-04 | 6.68E-03 |
| ENSG00000079337 | RAPGEF3    | 62.67    | -1.27          | 0.36  | -3.51 | 4.55E-04 | 1.15E-02 |
| ENSG00000007908 | SELE       | 62.24    | -3.59          | 0.64  | -5.58 | 2.38E-08 | 5.11E-06 |
| ENSG00000120279 | MYCT1      | 60.83    | -2.37          | 0.53  | -4.44 | 9.07E-06 | 6.34E-04 |
| ENSG00000272636 | DOC2B      | 59.99    | -1.56          | 0.37  | -4.26 | 2.01E-05 | 1.14E-03 |
| ENSG00000169291 | SHE        | 59.80    | -1.61          | 0.38  | -4.30 | 1.68E-05 | 1.01E-03 |
| ENSG00000254510 | AP001107.5 | 59.80    | -2.36          | 0.65  | -3.65 | 2.66E-04 | 7.88E-03 |
| ENSG00000171115 | GIMAP8     | 59.78    | -1.33          | 0.44  | -3.00 | 2.70E-03 | 3.75E-02 |
| ENSG00000002079 | MYH16      | 59.41    | -3.70          | 0.78  | -4.75 | 2.03E-06 | 1.86E-04 |
| ENSG00000250899 | AC125807.2 | 59.28    | -2.35          | 0.44  | -5.39 | 7.22E-08 | 1.31E-05 |
| ENSG00000135063 | FAM189A2   | 58.90    | -1.50          | 0.47  | -3.19 | 1.41E-03 | 2.52E-02 |
| ENSG00000147113 | CXorf36    | 58.88    | -1.53          | 0.50  | -3.05 | 2.27E-03 | 3.40E-02 |
| ENSG00000144891 | AGTR1      | 56.12    | -1.11          | 0.34  | -3.23 | 1.24E-03 | 2.31E-02 |
| ENSG00000256546 | AC156455.1 | 56.09    | -1.32          | 0.38  | -3.46 | 5.45E-04 | 1.32E-02 |
| ENSG00000118004 | COLEC11    | 54.87    | -1.27          | 0.39  | -3.23 | 1.25E-03 | 2.33E-02 |
| ENSG00000183638 | RP1L1      | 54.56    | -2.16          | 0.49  | -4.40 | 1.10E-05 | 7.31E-04 |
| ENSG00000229214 | LINC00242  | 53.42    | -1.06          | 0.36  | -2.97 | 3.00E-03 | 4.02E-02 |
| ENSG00000226415 | TP1P1      | 52.86    | -1.22          | 0.41  | -2.98 | 2.92E-03 | 3.96E-02 |
| ENSG00000189058 | APOD       | 52.54    | -2.58          | 0.53  | -4.85 | 1.23E-06 | 1.26E-04 |
| ENSG00000152207 | CYSLTR2    | 52.02    | -1.16          | 0.40  | -2.93 | 3.36E-03 | 4.31E-02 |
| ENSG00000215704 | CELA2B     | 51.87    | -5.04          | 0.99  | -5.07 | 3.97E-07 | 5.22E-05 |
| ENSG00000146205 | ANO7       | 51.57    | -1.04          | 0.24  | -4.37 | 1.22E-05 | 7.87E-04 |
| ENSG00000136574 | GATA4      | 49.78    | -1.11          | 0.33  | -3.36 | 7.81E-04 | 1.70E-02 |
| ENSG00000110852 | CLEC2B     | 49.60    | -1.53          | 0.43  | -3.53 | 4.15E-04 | 1.07E-02 |
| ENSG00000169427 | KCNK9      | 48.52    | -1.75          | 0.41  | -4.22 | 2.43E-05 | 1.33E-03 |
| ENSG00000171631 | P2RY6      | 48.40    | -1.02          | 0.35  | -2.94 | 3.32E-03 | 4.28E-02 |
| ENSG00000232396 | AC004882.1 | 47.44    | -2.05          | 0.41  | -4.99 | 5.91E-07 | 7.35E-05 |
| ENSG00000205364 | MT1M       | 47.26    | -3.50          | 0.76  | -4.64 | 3.52E-06 | 2.98E-04 |
| ENSG00000010319 | SEMA3G     | 46.68    | -2.47          | 0.37  | -6.62 | 3.56E-11 | 2.41E-08 |
| ENSG00000151023 | ENKUR      | 46.38    | -1.74          | 0.33  | -5.24 | 1.59E-07 | 2.44E-05 |
| ENSG00000267107 | PCAT19     | 45.48    | -3.07          | 0.43  | -7.11 | 1.15E-12 | 1.10E-09 |
| ENSG00000196639 | HRH1       | 44.48    | -1.32          | 0.35  | -3.77 | 1.64E-04 | 5.54E-03 |
| ENSG00000214110 | LDHAP4     | 44.43    | -1.88          | 0.63  | -2.98 | 2.92E-03 | 3.96E-02 |
| ENSG00000253669 | GASAL1     | 43.32    | -1.72          | 0.42  | -4.12 | 3.75E-05 | 1.86E-03 |
| ENSG00000182162 | P2RY8      | 43.17    | -2.66          | 0.37  | -7.16 | 8.07E-13 | 8.18E-10 |
| ENSG00000129467 | ADCY4      | 42.66    | -1.11          | 0.37  | -3.03 | 2.44E-03 | 3.55E-02 |
| ENSG00000102924 | CBLN1      | 42.04    | -1.73          | 0.56  | -3.10 | 1.93E-03 | 3.11E-02 |

| Gene stable ID  | Gene name   | baseMean | log2FoldChange | lfcSE | stat  | pvalue   | padj     |
|-----------------|-------------|----------|----------------|-------|-------|----------|----------|
| ENSG00000237989 | LINC01679   | 41.93    | -1.20          | 0.41  | -2.92 | 3.46E-03 | 4.40E-02 |
| ENSG00000248323 | LUCAT1      | 41.27    | -2.07          | 0.61  | -3.39 | 6.96E-04 | 1.57E-02 |
| ENSG00000135547 | HEY2        | 41.19    | -1.29          | 0.42  | -3.07 | 2.11E-03 | 3.26E-02 |
| ENSG00000134817 | APLNR       | 40.67    | -3.63          | 0.74  | -4.92 | 8.62E-07 | 9.78E-05 |
| ENSG00000273604 | EPOP        | 40.66    | -1.21          | 0.41  | -2.92 | 3.47E-03 | 4.40E-02 |
| ENSG00000075340 | ADD2        | 40.54    | -1.85          | 0.54  | -3.45 | 5.66E-04 | 1.36E-02 |
| ENSG00000243480 | AMY2A       | 40.42    | -8.75          | 1.95  | -4.49 | 7.06E-06 | 5.22E-04 |
| ENSG00000196839 | ADA         | 39.21    | -1.36          | 0.34  | -4.04 | 5.34E-05 | 2.40E-03 |
| ENSG00000130052 | STARD8      | 38.99    | -1.24          | 0.31  | -3.95 | 7.74E-05 | 3.21E-03 |
| ENSG00000227630 | LINC01132   | 38.65    | -1.73          | 0.36  | -4.77 | 1.86E-06 | 1.74E-04 |
| ENSG00000142677 | IL22RA1     | 38.45    | -2.12          | 0.74  | -2.86 | 4.21E-03 | 4.96E-02 |
| ENSG00000283406 | DGCR5       | 38.29    | -1.05          | 0.34  | -3.10 | 1.96E-03 | 3.11E-02 |
| ENSG00000280219 | AC093908.1  | 37.81    | -1.20          | 0.39  | -3.05 | 2.26E-03 | 3.40E-02 |
| ENSG00000124191 | TOX2        | 36.92    | -1.20          | 0.37  | -3.23 | 1.23E-03 | 2.30E-02 |
| ENSG00000166736 | HTR3A       | 35.83    | -2.95          | 0.82  | -3.57 | 3.55E-04 | 9.57E-03 |
| ENSG00000138798 | EGF         | 35.38    | -1.81          | 0.37  | -4.95 | 7.42E-07 | 8.87E-05 |
| ENSG00000233901 | LINC01503   | 35.03    | -1.63          | 0.50  | -3.25 | 1.14E-03 | 2.20E-02 |
| ENSG00000197520 | FAM177B     | 34.88    | -1.45          | 0.38  | -3.81 | 1.40E-04 | 4.94E-03 |
| ENSG00000163083 | INHBB       | 34.85    | -1.95          | 0.64  | -3.05 | 2.27E-03 | 3.40E-02 |
| ENSG00000235831 | BHLHE40-AS1 | 34.24    | -1.42          | 0.37  | -3.81 | 1.39E-04 | 4.90E-03 |
| ENSG00000205358 | MT1H        | 34.13    | -3.88          | 0.62  | -6.22 | 5.12E-10 | 2.40E-07 |
| ENSG00000261051 | AC107021.2  | 33.64    | -1.46          | 0.36  | -4.02 | 5.78E-05 | 2.56E-03 |
| ENSG00000153162 | BMP6        | 33.35    | -2.20          | 0.45  | -4.89 | 1.02E-06 | 1.11E-04 |
| ENSG00000134323 | MYCN        | 32.18    | -1.22          | 0.37  | -3.27 | 1.09E-03 | 2.15E-02 |
| ENSG00000271959 | AC100803.3  | 30.89    | -1.86          | 0.55  | -3.39 | 6.98E-04 | 1.58E-02 |
| ENSG00000225217 | HSPA7       | 30.16    | -4.21          | 0.85  | -4.97 | 6.73E-07 | 8.19E-05 |
| ENSG00000283154 | IQCJ-SCHIP1 | 30.06    | -1.36          | 0.46  | -2.97 | 3.02E-03 | 4.04E-02 |
| ENSG00000164743 | C8orf48     | 29.60    | -1.45          | 0.33  | -4.40 | 1.09E-05 | 7.27E-04 |
| ENSG00000275302 | CCL4        | 29.37    | -1.45          | 0.45  | -3.23 | 1.23E-03 | 2.30E-02 |
| ENSG00000167178 | ISLR2       | 29.23    | -1.19          | 0.40  | -2.97 | 2.97E-03 | 4.00E-02 |
| ENSG00000172548 | NIPAL4      | 27.53    | -2.34          | 0.81  | -2.90 | 3.73E-03 | 4.61E-02 |
| ENSG00000140519 | RHCG        | 27.45    | -3.84          | 0.90  | -4.28 | 1.84E-05 | 1.07E-03 |
| ENSG00000273802 | HIST1H2BG   | 27.44    | -1.30          | 0.45  | -2.90 | 3.68E-03 | 4.57E-02 |
| ENSG00000179144 | GIMAP7      | 27.19    | -1.90          | 0.50  | -3.78 | 1.56E-04 | 5.35E-03 |
| ENSG00000187848 | P2RX2       | 26.97    | -2.11          | 0.66  | -3.22 | 1.29E-03 | 2.37E-02 |
| ENSG00000189410 | SH2D5       | 26.85    | -2.32          | 0.78  | -2.96 | 3.11E-03 | 4.11E-02 |
| ENSG00000232192 | KIF26B-AS1  | 26.16    | -1.26          | 0.40  | -3.14 | 1.67E-03 | 2.81E-02 |
| ENSG00000179674 | ARL14       | 25.70    | -2.39          | 0.76  | -3.16 | 1.57E-03 | 2.70E-02 |
| ENSG00000168298 | HIST1H1E    | 25.13    | -1.39          | 0.43  | -3.22 | 1.28E-03 | 2.36E-02 |
| ENSG00000101230 | ISM1        | 24.37    | -1.84          | 0.55  | -3.34 | 8.36E-04 | 1.78E-02 |
| ENSG00000117245 | KIF17       | 24.37    | -1.54          | 0.36  | -4.27 | 1.99E-05 | 1.13E-03 |
| ENSG00000175084 | DES         | 24.16    | -2.20          | 0.57  | -3.88 | 1.05E-04 | 3.99E-03 |
| ENSG00000163673 | DCLK3       | 23.89    | -2.07          | 0.66  | -3.16 | 1.58E-03 | 2.71E-02 |
| ENSG00000185467 | KPNA7       | 23.59    | -3.20          | 1.10  | -2.90 | 3.77E-03 | 4.64E-02 |
| ENSG00000114204 | SERPIN12    | 22.99    | -4.41          | 0.93  | -4.75 | 2.07E-06 | 1.87E-04 |
| ENSG00000284882 | AL359762.1  | 22.60    | -1.14          | 0.35  | -3.31 | 9.33E-04 | 1.92E-02 |
| ENSG00000176887 | SOX11       | 22.06    | -2.04          | 0.60  | -3.38 | 7.15E-04 | 1.60E-02 |
| ENSG00000147257 | GPC3        | 21.69    | -1.99          | 0.62  | -3.20 | 1.39E-03 | 2.49E-02 |
| ENSG00000132321 | IQCA1       | 21.43    | -1.31          | 0.43  | -3.03 | 2.46E-03 | 3.55E-02 |
| ENSG00000101938 | CHRD1       | 21.05    | -2.41          | 0.78  | -3.09 | 2.02E-03 | 3.17E-02 |
| ENSG00000230472 | AL135908.1  | 20.63    | -3.08          | 0.83  | -3.73 | 1.91E-04 | 6.20E-03 |
| ENSG00000227038 | GTF2IP7     | 20.52    | -1.41          | 0.46  | -3.06 | 2.23E-03 | 3.36E-02 |
| ENSG00000259466 | NPM1P47     | 20.07    | -2.47          | 0.52  | -4.78 | 1.76E-06 | 1.67E-04 |
| ENSG00000213085 | CFAP45      | 19.42    | -1.43          | 0.46  | -3.10 | 1.96E-03 | 3.11E-02 |
| ENSG00000127589 | TUBBP1      | 19.04    | -1.54          | 0.37  | -4.11 | 3.90E-05 | 1.91E-03 |
| ENSG00000185668 | POU3F1      | 18.96    | -1.25          | 0.43  | -2.91 | 3.57E-03 | 4.50E-02 |
| ENSG00000280255 | AC004947.2  | 18.35    | -1.48          | 0.44  | -3.34 | 8.24E-04 | 1.76E-02 |
| ENSG00000224189 | HAGLR       | 18.28    | -2.04          | 0.64  | -3.18 | 1.47E-03 | 2.60E-02 |
| ENSG00000122679 | RAMP3       | 17.68    | -1.89          | 0.58  | -3.26 | 1.10E-03 | 2.16E-02 |
| ENSG00000162367 | TAL1        | 17.44    | -1.59          | 0.42  | -3.82 | 1.34E-04 | 4.77E-03 |
| ENSG00000283265 | AL356234.3  | 16.18    | -1.94          | 0.55  | -3.53 | 4.21E-04 | 1.08E-02 |
| ENSG00000225285 | LINC01770   | 15.88    | -1.65          | 0.51  | -3.26 | 1.12E-03 | 2.17E-02 |
| ENSG00000237643 | AL365226.2  | 15.50    | -5.29          | 1.20  | -4.42 | 9.79E-06 | 6.72E-04 |
| ENSG00000277632 | CCL3        | 15.48    | -1.75          | 0.45  | -3.85 | 1.19E-04 | 4.36E-03 |
| ENSG00000130307 | USHBP1      | 15.11    | -1.90          | 0.48  | -3.92 | 8.79E-05 | 3.48E-03 |
| ENSG00000164736 | SOX17       | 14.70    | -1.71          | 0.53  | -3.26 | 1.11E-03 | 2.16E-02 |
| ENSG00000158683 | PKD1L1      | 14.60    | -1.84          | 0.57  | -3.23 | 1.24E-03 | 2.31E-02 |
| ENSG00000177398 | UMODL1      | 14.57    | -1.55          | 0.49  | -3.19 | 1.42E-03 | 2.54E-02 |
| ENSG00000157856 | DRC1        | 14.46    | -2.15          | 0.73  | -2.95 | 3.18E-03 | 4.17E-02 |
| ENSG00000234292 | AC123595.1  | 14.30    | -2.81          | 0.68  | -4.14 | 3.54E-05 | 1.78E-03 |
| ENSG00000080709 | KCNN2       | 14.28    | -1.95          | 0.59  | -3.33 | 8.56E-04 | 1.80E-02 |
| ENSG00000240509 | RPL34P18    | 13.85    | -1.25          | 0.41  | -3.06 | 2.22E-03 | 3.35E-02 |
| ENSG00000256925 | ADGRA1-AS1  | 13.68    | -1.55          | 0.53  | -2.91 | 3.60E-03 | 4.52E-02 |
| ENSG00000120149 | MSX2        | 13.63    | -2.12          | 0.70  | -3.03 | 2.45E-03 | 3.55E-02 |
| ENSG00000249751 | ECSCR       | 12.67    | -2.49          | 0.61  | -4.06 | 4.96E-05 | 2.26E-03 |
| ENSG00000188596 | CFAP54      | 12.08    | -1.47          | 0.51  | -2.88 | 3.92E-03 | 4.76E-02 |
| ENSG00000171517 | LPAR3       | 11.68    | -4.45          | 1.19  | -3.73 | 1.93E-04 | 6.25E-03 |
| ENSG00000153495 | TEX29       | 11.63    | -2.23          | 0.75  | -2.97 | 2.94E-03 | 3.97E-02 |
| ENSG00000237250 | AL359924.1  | 11.41    | -2.30          | 0.58  | -3.97 | 7.27E-05 | 3.06E-03 |
| ENSG00000142748 | FCN3        | 11.32    | -4.07          | 0.94  | -4.34 | 1.42E-05 | 8.82E-04 |
| ENSG00000123685 | BATF3       | 11.22    | -1.95          | 0.52  | -3.77 | 1.66E-04 | 5.56E-03 |
| ENSG00000236345 | AL354719.2  | 11.16    | -2.95          | 0.93  | -3.17 | 1.52E-03 | 2.64E-02 |
| ENSG00000162444 | RBP7        | 11.15    | -1.74          | 0.50  | -3.50 | 4.66E-04 | 1.16E-02 |
| ENSG00000241158 | ADAMTS9-AS1 | 10.45    | -5.31          | 1.31  | -4.07 | 4.68E-05 | 2.19E-03 |
| ENSG00000146399 | TAAR1       | 10.27    | -1.89          | 0.60  | -3.18 | 1.47E-03 | 2.60E-02 |
| ENSG00000186564 | FOXO2       | 10.25    | -1.50          | 0.50  | -3.02 | 2.55E-03 | 3.64E-02 |
| ENSG00000111886 | GABRR2      | 10.15    | -1.57          | 0.50  | -3.12 | 1.78E-03 | 2.95E-02 |
| ENSG00000150048 | CLEC1A      | 9.98     | -2.78          | 0.73  | -3.82 | 1.33E-04 | 4.77E-03 |
| ENSG00000263571 | AC004147.2  | 9.77     | -1.81          | 0.55  | -3.26 | 1.10E-03 | 2.16E-02 |



| Gene stable ID  | Gene name   | baseMean | log2FoldChange | lfcSE | stat  | pvalue   | padj     |
|-----------------|-------------|----------|----------------|-------|-------|----------|----------|
| ENSG00000205362 | MT1A        | 9.75     | -2.43          | 0.65  | -3.76 | 1.73E-04 | 5.74E-03 |
| ENSG00000248771 | SMIM31      | 9.55     | -1.88          | 0.58  | -3.21 | 1.34E-03 | 2.44E-02 |
| ENSG00000144119 | C1QL2       | 9.46     | -4.56          | 1.32  | -3.46 | 5.32E-04 | 1.29E-02 |
| ENSG00000054938 | CHRD2       | 9.36     | -2.51          | 0.78  | -3.22 | 1.28E-03 | 2.36E-02 |
| ENSG00000145283 | SLC10A6     | 9.30     | -3.02          | 0.74  | -4.06 | 4.84E-05 | 2.23E-03 |
| ENSG00000284395 | AL032819.3  | 9.29     | -2.66          | 0.78  | -3.42 | 6.22E-04 | 1.46E-02 |
| ENSG00000231483 | AL365356.4  | 9.13     | -2.80          | 0.83  | -3.39 | 6.96E-04 | 1.57E-02 |
| ENSG00000267097 | SLC14A2-AS1 | 9.07     | -2.61          | 0.71  | -3.68 | 2.38E-04 | 7.26E-03 |
| ENSG00000277749 | AC023300.2  | 9.00     | -2.14          | 0.67  | -3.22 | 1.27E-03 | 2.34E-02 |
| ENSG00000240602 | AADACP1     | 8.45     | -2.34          | 0.71  | -3.29 | 9.88E-04 | 1.99E-02 |
| ENSG00000178821 | TMEM52      | 8.38     | -2.47          | 0.80  | -3.08 | 2.10E-03 | 3.25E-02 |

**Supplementary Table 2** Pseudoislet preparations display reduced mRNA levels of exocrine and endothelial cell markers compared to islets. Differentially expressed genes (>2-fold, padj<0.05) between human islets and pseudoislets

|                   | Protein                                                          | Gene name | islet Mean | log2fold Change | padj     | Expression cells |      |              |      |      |            |
|-------------------|------------------------------------------------------------------|-----------|------------|-----------------|----------|------------------|------|--------------|------|------|------------|
|                   |                                                                  |           |            |                 |          | Acinar           | Duct | Endo-thelial | PSCs | MI/M | Endo-crine |
| Acinar and Ductal | Serine Peptidase Inhibitor, Kazal Type 1                         | SPINK1    | 2900.4     | -2.28           | 5.62E-04 | +++              | ++   |              |      |      | +          |
|                   | Serine proteases family                                          | PRSS1     | 4019.8     | -4.41           | 3.41E-03 | +++              | ++   |              |      |      | +          |
|                   |                                                                  | PRSS2     | 8384.8     | -3.86           | 1.05E-02 | ++               |      |              |      |      |            |
|                   |                                                                  | PRSS3     | 294.1      | -1.51           | 8.98E-03 | +++              | +    |              |      |      | +          |
|                   |                                                                  | PRSS35    | 41.6       | 2.94            | 1.22E-05 |                  | +    |              |      |      |            |
|                   |                                                                  | PRSS23    | 4668.1     | -0.79           | 4.78E-03 | +                | ++   |              |      |      | +          |
|                   | Colipase                                                         | CLPS      | 967.0      | -9.17           | 3.11E-04 | +++              | ++   |              |      |      |            |
|                   | Chymotrypsin C                                                   | CTRC      | 836.5      | -6.20           | 1.21E-04 | +++              |      |              |      |      |            |
|                   | Carboxypeptidase A                                               | CPA1      | 3112.4     | -5.40           | 1.04E-03 | +++              |      |              |      |      |            |
|                   |                                                                  | CPA2      | 1050.8     | -4.08           | 1.68E-03 | +++              |      |              |      |      |            |
|                   | Carboxypeptidase B                                               | CPB1      | 1490.0     | -4.22           | 1.53E-05 | +++              | +    |              |      |      | +          |
|                   | Chymotrypsinogen B                                               | CTRB1     | 654.6      | -5.01           | 4.00E-03 | +++              | +    |              |      |      |            |
|                   |                                                                  | CTRB2     | 2308.2     | -5.24           | 9.56E-05 | +++              | +    |              |      |      |            |
|                   | Chymotrypsin Like Elastase                                       | CELA2A    | 211.6      | -6.00           | 1.38E-04 | +++              | +    |              |      |      |            |
|                   |                                                                  | CELA2B    | 51.9       | -5.04           | 5.22E-05 | +++              |      |              |      |      |            |
|                   |                                                                  | CELA3A    | 2894.1     | -6.37           | 3.25E-03 | +++              | +    |              |      |      |            |
|                   |                                                                  | CELA3B    | 777.8      | -7.63           | 2.07E-05 | +++              |      |              |      |      |            |
|                   | Kallikrein 1                                                     | KLK1      | 165.1      | -5.71           | 1.06E-05 | +++              |      |              |      |      |            |
|                   | Pancreatic Lipase                                                | PNLIP     | 1687.1     | -3.77           | 7.05E-04 | +++              |      |              |      |      |            |
|                   | Pancreatic Lipase-Related Protein                                | PNLIPRP1  | 496.6      | -4.42           | 9.61E-04 | +++              |      |              |      |      |            |
|                   |                                                                  | PNLIPRP2  | 186.2      | -2.83           | 4.94E-02 | +++              |      |              |      |      |            |
|                   | Regenerating Family Member                                       | REG1A     | 13255.8    | -4.36           | 2.06E-03 | +++              | ++   |              |      |      | +          |
|                   |                                                                  | REG1B     | 6652.2     | -8.03           | 3.75E-10 | +++              | +    |              |      |      |            |
|                   |                                                                  | REG3A     | 681.2      | -2.90           | 3.54E-02 | +++              | +    |              |      |      | +          |
|                   |                                                                  | REG3G     | 378.8      | -4.95           | 4.74E-02 | +++              |      |              |      |      |            |
|                   | Carboxyl Ester Lipase                                            | CEL       | 1032.1     | -4.71           | 1.17E-03 | +++              |      |              |      |      |            |
|                   | Phospholipase A2 Group IB                                        | PLA2G1B   | 962.0      | -5.84           | 4.85E-05 | +++              | +    |              |      |      | +          |
|                   | GATA Binding Protein 4                                           | GATA4     | 49.8       | -1.11           | 1.70E-02 | ++               | +    |              |      |      |            |
|                   | Syncollin                                                        | SYCN      | 147.7      | -6.70           | 4.29E-04 | ++               |      |              |      |      |            |
|                   | Amylase Alpha 2A                                                 | AMY2A     | 40.4       | -8.75           | 5.22E-04 | +                |      |              |      |      |            |
|                   | Serpin Family I Member 2                                         | SERPINI2  | 23.0       | -4.41           | 1.87E-04 | ++               |      |              |      |      |            |
|                   | Arylacetamide Deacetylase                                        | AADAC     | 73.3       | -4.03           | 4.00E-03 | ++               |      |              |      |      |            |
|                   | Metallothionein 1H                                               | MT1H      | 34.1       | -3.88           | 2.40E-07 | +++              | ++   |              |      |      |            |
| Endothelial       | Fms Related Tyrosine Kinase 1                                    | FLT1      | 1227.9     | -2.46           | 2.30E-06 |                  |      | +++          |      |      |            |
|                   | Kinase Insert Domain Receptor                                    | KDR       | 741.3      | -2.57           | 1.07E-12 |                  |      | +++          |      |      |            |
|                   | Cluster of Differentiation 93                                    | CD93      | 1267.0     | -2.95           | 1.01E-10 |                  |      | +++          |      |      |            |
|                   | Endothelial Cell Adhesion Molecule                               | ESAM      | 284.6      | -2.09           | 2.18E-05 |                  | +    | +++          |      |      |            |
|                   | Platelet And Endothelial Cell Adhesion Molecule 1                | PECAM1    | 1101.3     | -1.76           | 4.89E-04 |                  |      | +++          |      |      |            |
|                   | Endothelial Cell Specific Molecule 1                             | ESM1      | 526.3      | -2.84           | 6.99E-08 |                  |      | +++          |      |      |            |
|                   | Solute Carrier Organic Anion Transporter Family Member 2A1       | SLCO2A1   | 185.7      | -1.95           | 1.06E-04 | +                | +    | ++           |      |      |            |
|                   | Plasmalemma Vesicle Associated Protein                           | PLVAP     | 2247.3     | -2.18           | 2.16E-04 |                  |      | +++          |      |      |            |
|                   | Regulator Of Cell Cycle                                          | RGCC      | 200.1      | -1.75           | 5.61E-08 |                  |      | +++          |      |      |            |
|                   | SMAD6                                                            | SMAD6     | 226.2      | -0.84           | 1.06E-04 | +                | +    | ++           |      |      |            |
|                   | erythroblast transformation-specific Transcription Factor        | ERG       | 179.2      | -2.12           | 8.87E-05 |                  |      | +++          |      |      |            |
|                   | Beta-Interferon Gene Positive-Regulatory Domain I Binding Factor | PRDM1     | 349.8      | -1.20           | 6.69E-03 |                  |      | +++          | +    |      |            |
|                   | Transcription Factor 4                                           | TCF4      | 1717.9     | -0.31           | 2.81E-02 |                  |      | +++          |      |      | +          |
|                   | Neurogenic Locus Notch Homolog Protein                           | NOTCH4    | 267.4      | -1.77           | 1.07E-03 |                  |      | ++           |      |      |            |
|                   | NK2 Homeobox 3                                                   | NKX2-3    | 82.3       | -1.61           | 2.25E-02 |                  |      | +            |      |      |            |
|                   | ETS Proto-Oncogene 1, Transcription Factor                       | ETS1      | 2568.9     | -0.83           | 5.10E-06 | +                | +    | +++          | +    |      | +          |
|                   | Intercellular Adhesion Molecule 1                                | ICAM1     | 581.2      | -1.24           | 4.37E-02 | +                | ++   | +++          |      |      | +          |
|                   | laminin subunit alpha 4                                          | LAMA4     | 1323.2     | -1.19           | 2.06E-03 |                  |      | +++          | ++   |      |            |
|                   | collagen type IV alpha 1 chain                                   | COL4A1    | 10087.9    | -1.30           | 8.53E-03 |                  | +    | +++          | +++  |      |            |
|                   | multimerin 2                                                     | MMRN2     | 232.7      | -2.32           | 2.02E-06 |                  |      | ++           |      |      |            |
|                   | von Willebrand factor                                            | VWF       | 660.6      | -2.14           | 2.89E-03 |                  |      | ++           |      |      |            |
|                   | cadherin 5                                                       | CDH5      | 165.0      | -2.23           | 3.62E-03 |                  |      | +++          |      |      |            |
|                   | protocadherin 12                                                 | PCDH12    | 172.7      | -1.15           | 2.17E-04 |                  |      | ++           |      |      |            |
|                   | scavenger receptor class F member 1                              | SCARF1    | 152.4      | -1.36           | 1.14E-04 |                  | +    | ++           |      |      | +          |
|                   | selectin E                                                       | SELE      | 62.2       | -3.59           | 5.11E-06 |                  |      | +            |      |      |            |
